# Supplementary material for: Usability and Acceptance of Wearable Biosensors in Forensic Psychiatry: Cross-sectional Questionnaire Study
Source: PubMed Central journal article supplement (PMC8145084; doi:10.2196/18096), 2021-05-10
Supplement: formative_v5i5e18096_app1.pdf [file formative_v5i5e18096_app1.pdf]

**Wilt u zo vriendelijk zijn om het juiste antwoord te omcirkelen of in te vullen?**

Onderzoeksnummer

:

Datum:

|                                   |        |        |       |          |
|-----------------------------------|--------|--------|-------|----------|
| 1. Welk product heeft u gedragen? | Fitbit | Garmin | Spire | Ticwatch |
|-----------------------------------|--------|--------|-------|----------|

|                        |     |       |
|------------------------|-----|-------|
| 2. Wat is uw geslacht? | Man | Vrouw |
|------------------------|-----|-------|

|                       |  |
|-----------------------|--|
| 3. Wat is uw leeftijd |  |
|-----------------------|--|

|                                                                            |               |           |      |     |     |     |              |
|----------------------------------------------------------------------------|---------------|-----------|------|-----|-----|-----|--------------|
| 4. Wat is uw hoogst genoten opleiding waarvoor u een diploma hebt behaald? | Lagere school | VMBO/MAVO | HAVO | VWO | MBO | HBO | Universiteit |
|----------------------------------------------------------------------------|---------------|-----------|------|-----|-----|-----|--------------|

|                                                                                           |  |
|-------------------------------------------------------------------------------------------|--|
| 5. Over het algemeen zou ik de gebruiksvriendelijkheid van dit product beoordelen als ... |  |
|-------------------------------------------------------------------------------------------|--|

|                                                                                | Helemaal mee eens | Mee eens | Weet niet, neutraal | Mee oneens          | Helemaal oneens   |            |                 |
|--------------------------------------------------------------------------------|-------------------|----------|---------------------|---------------------|-------------------|------------|-----------------|
| SUS1: Ik wil het product vaker gebruiken.                                      | 5                 | 4        | 3                   | 2                   | 1                 |            |                 |
| SUS2: Ik vind het product ingewikkeld.                                         | 5                 | 4        | 3                   | 2                   | 1                 |            |                 |
| SUS3: Het product is moeilijker te gebruiken dan ik dacht.                     | 5                 | 4        | 3                   | 2                   | 1                 |            |                 |
| SUS4: Ik denk dat ik hulp moet hebben om het product te gebruiken.             | 5                 | 4        | 3                   | 2                   | 1                 |            |                 |
| SUS5: Ik vond dat het apparaatje en de app goed bij elkaar passen.             | 5                 | 4        | 3                   | 2                   | 1                 |            |                 |
| SUS6: Ik vind dat het apparaatje en de app niet bij elkaar passen.             | 5                 | 4        | 3                   | 2                   | 1                 |            |                 |
| SUS7: Ik denk dat veel mensen het product heel snel leren gebruiken.           | 5                 | 4        | 3                   | 2                   | 1                 |            |                 |
| SUS8: Ik vond het product erg moeilijk om te gebruiken.                        | 5                 | 4        | 3                   | 2                   | 1                 |            |                 |
| SUS9: Ik denk dat ik om kan gaan met het product.                              | 5                 | 4        | 3                   | 2                   | 1                 |            |                 |
| SUS10: Ik moest veel leren over het product voordat ik het kon gaan gebruiken. | 5                 | 4        | 3                   | 2                   | 1                 |            |                 |
|                                                                                | Helemaal mee eens | Mee eens | Beetje mee eens     | Weet niet, neutraal | Beetje mee oneens | Mee oneens | Helemaal oneens |
| TAMAT3: Het bevalt mij goed om dit product te gebruiken.                       | 7                 | 6        | 5                   | 4                   | 3                 | 2          | 1               |
| TAMPE2: Ik vind het makkelijk om dit product te gebruiken.                     | 7                 | 6        | 5                   | 4                   | 3                 | 2          | 1               |

|                                                                                                   | Helemaal mee eens | Mee eens | Beetje mee eens | Weet niet, neutraal | Beetje mee oneens | Mee oneens | Helemaal oneens |
|---------------------------------------------------------------------------------------------------|-------------------|----------|-----------------|---------------------|-------------------|------------|-----------------|
| TAMPU3: Dit product kan ik goed gebruiken bij de dingen die ik moet doen.                         | 7                 | 6        | 5               | 4                   | 3                 | 2          | 1               |
| TAMAQ3: Dit product ziet er mooi uit en ik heb er plezier van.                                    | 7                 | 6        | 5               | 4                   | 3                 | 2          | 1               |
| TAMRA2: Dit product heeft meer goede kanten dan slechte kanten.                                   | 7                 | 6        | 5               | 4                   | 3                 | 2          | 1               |
| TAMMB2: Dit product kan ik overal gebruiken.                                                      | 7                 | 6        | 5               | 4                   | 3                 | 2          | 1               |
| TAMAV2: Dit product geeft mij informatie wanneer ik het wil.                                      | 7                 | 6        | 5               | 4                   | 3                 | 2          | 1               |
| TAMSA1: Dit product maakt dat ik anders ben dan andere mensen.                                    | 7                 | 6        | 5               | 4                   | 3                 | 2          | 1               |
| TAMCT1: Ik denk dat het product duur is.                                                          | 7                 | 6        | 5               | 4                   | 3                 | 2          | 1               |
| EECMPU3: Dit product maakt veel dingen makkelijker.                                               | 7                 | 6        | 5               | 4                   | 3                 | 2          | 1               |
| EECMST2: Ik vond het fijn dit product te gebruiken.                                               | 7                 | 6        | 5               | 4                   | 3                 | 2          | 1               |
| EECMCF1: Dit product was beter dan ik had verwacht.                                               | 7                 | 6        | 5               | 4                   | 3                 | 2          | 1               |
| EECMCF3: Dit product kan meer dan ik dacht.                                                       | 7                 | 6        | 5               | 4                   | 3                 | 2          | 1               |
| EECMHM3: Ik heb plezier als ik dit product gebruik.                                               | 7                 | 6        | 5               | 4                   | 3                 | 2          | 1               |
| EECMSsM2: Mensen die belangrijk voor me zijn vinden het een goed idee dat ik dit product gebruik. | 7                 | 6        | 5               | 4                   | 3                 | 2          | 1               |
| EECMSsM4: Door dit product word ik gezonder.                                                      | 7                 | 6        | 5               | 4                   | 3                 | 2          | 1               |
| EECMPP3: Andere mensen kunnen de informatie van dit product stelen.                               | 7                 | 6        | 5               | 4                   | 3                 | 2          | 1               |
| EECMPC1: Ik kan dit product niet te lang gebruiken omdat hij zwaar en groot is.                   | 7                 | 6        | 5               | 4                   | 3                 | 2          | 1               |
| EECMPC2: Soms voel ik me niet fijn als ik dit product gebruik.                                    | 7                 | 6        | 5               | 4                   | 3                 | 2          | 1               |
| EECMBIC2: De batterij van het product gaat niet lang mee.                                         | 7                 | 6        | 5               | 4                   | 3                 | 2          | 1               |
| EECMPAFL1: Ik denk dat de informatie van het product klopt.                                       | 7                 | 6        | 5               | 4                   | 3                 | 2          | 1               |
| EECMCU1 en TAMIU2: Ik wil dit product blijven gebruiken.                                          | 7                 | 6        | 5               | 4                   | 3                 | 2          | 1               |
